# Supplementary material for: Highly dispersed Ru nanoclusters anchored on B,N co-doped carbon nanotubes for water splitting
Source: Royal Society of Chemistry journal article supplement (doi:10.1039/d1qi01672e), 2022-01-01
Supplement: d1qi01672e1.pdf [file d1qi01672e1.pdf]

*Supporting Information for*

**Highly Dispersed Ru Nanoclusters Anchored on B, N Co-doped Carbon Nanotubes for Water Splitting**

Meihong Fan,<sup>a</sup> Xinran Chen,<sup>a</sup> Mingcheng Zhang,<sup>b</sup> Lili Cui,<sup>a</sup> Xingquan He,<sup>\*,a</sup> Xiaoxin Zou,<sup>\*,b</sup>

<sup>a</sup> School of Chemistry and Environmental Engineering, Changchun University of Science and Technology, 7089 Weixing Road, Changchun 130022, P. R. China

<sup>b</sup> State Key Laboratory of Inorganic Synthesis and Preparative Chemistry, College of Chemistry, Jilin University, Changchun 130012, China.

\* Corresponding authors: hexingquan@hotmail.com (X. He); xxzou@jlu.edu.cn (X. Zou)

**Table of Contents**

Experimental Procedures. (page S2)

Figures (Page S3-S6)

Tables (Page S7-S8)

## Chemicals and Reagents

Ruthenium trichloride hydrate ( $\text{RuCl}_3 \cdot x\text{H}_2\text{O}$ ) and carboxylated multi walled carbon nanotubes were purchased from Aladdin Chemistry Co., Ltd. Boric acid ( $\text{H}_3\text{BO}_3$ ) and urea ( $\text{CH}_4\text{N}_2\text{O}$ ) were obtained from Beijing Chemical Factory. Platinum on graphitized carbon (20 wt% Pt/C) and Nafion perfluorinated resin solution were bought from Alfa Aesar Chemicals Co., Ltd. Ethanol, isopropanol and sulfuric acid ( $\text{H}_2\text{SO}_4$ ) were purchased from Beijing Chemical Factory. Highly purified water ( $>18 \text{ M}\Omega \text{ cm}$  resistivity) was provided by a PALL PURELAB Plus system.

## Material Characterizations

The powder X-ray diffraction (XRD) patterns of the materials were obtained with X-ray diffractometer (Rigaku D/Max 2550) using  $\text{Cu K}\alpha$  radiation ( $\lambda = 1.5418 \text{ \AA}$ ). The morphology and structure of the as-prepared materials were characterized using a scanning electron microscope (SEM) (JSM-6701F, JEOL) that was operating at 5 kV and a transmission electron microscope (TEM) (JEM-2010, JEOL) that was operating at 200 kV. X-ray photoemission spectroscopy (XPS) measurements were performed on a Thermo Fisher Scientific ESCALAB 250Xi with photoelectron spectroscopy system using a monochromatic  $\text{Al K}\alpha$  (1486.6 eV) X-ray source. The surface area of catalyst was calculated by the Brunauer-Emmett-Teller (BET) method by a Micromeritics SSA-4300 system of Beijing BIOD Electronic Technology Co., Ltd.  $\text{H}_2$  temperature-programmed reduction characterizations ( $\text{H}_2$ -TPR) were performed using a Micromeritics AutoChem 2920 II system. Raman analysis was carried out on LabRAM HR Raman spectrometer of Bergson Beijing Co., Ltd

## Electrochemical Measurements

Electrochemical impedance spectroscopic (EIS) measurements were performed in KOH solution (1 M) to investigate the interfacial electron transfer dynamics of Ru@B,N-CNTs. The electrochemically active surface area (ECSA) was estimated by determining the double-layer capacitance of the system from CV.[1] Measurement of current in a selected non-Faradaic potential range was assumed to double-layer charging.  $C_{\text{dl}}$  was tested by a series of cyclic voltammetry (CV) measurements with various scan rates (10, 20, 30, 40, 50, 60, 70, 80, 90 and 100 mV/s) in  $-0.2 - -0.1 \text{ V versus SCE}$ . The sweep segments were set to 10 to ensure consistency in the measurements. The charging current,  $i_c$ , is equal to the product of the electrochemical double layer capacitance,  $C_{\text{dl}}$ , and the scan rate,  $\nu$ ,

$$i_c = \nu C_{\text{dl}} \quad \text{Eqn. 1}$$

Subsequently, the  $C_{\text{dl}}$  was estimated by the half of the slope of the fitting line by plotting the difference of currents ( $i$ ) between the anodic and cathodic sweeps ( $i_{\text{anodic}} - i_{\text{cathodic}}$ ) at  $-0.15 \text{ V versus SCE}$  against the scan rate. The electrochemically active surface area (ECSA) of the catalyst can be calculated by dividing  $C_{\text{dl}}$  by the specific capacitance of the sample. The twice of  $C_{\text{dl}}$  value is proportional to the ECSA of the catalyst. The ECSA of catalyst on GCE is estimated according to Eqn. 2:

$$\text{ECSA} = \frac{C_{dl}}{C_s} \quad \text{Eqn. 2}$$

where  $C_s$  is the specific capacitance of the sample. In this work, the value of  $C_s$  is estimated to be 0.06 mF/cm<sup>2</sup> according to previous reports[2].

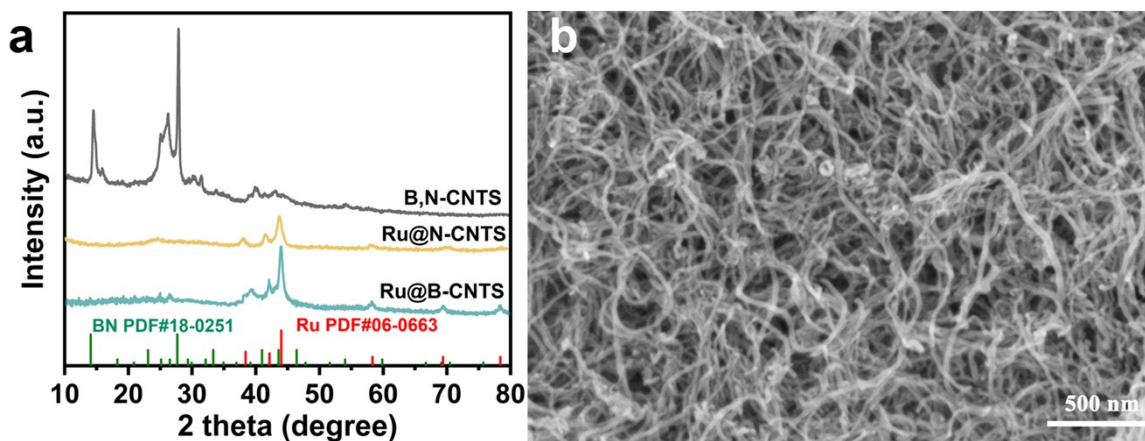

**Figure S1** (a) XRD patterns of B,N-CNTs, Ru@N-CNTs and Ru@B-CNTs. (b) SEM image of CNTs-COOH.

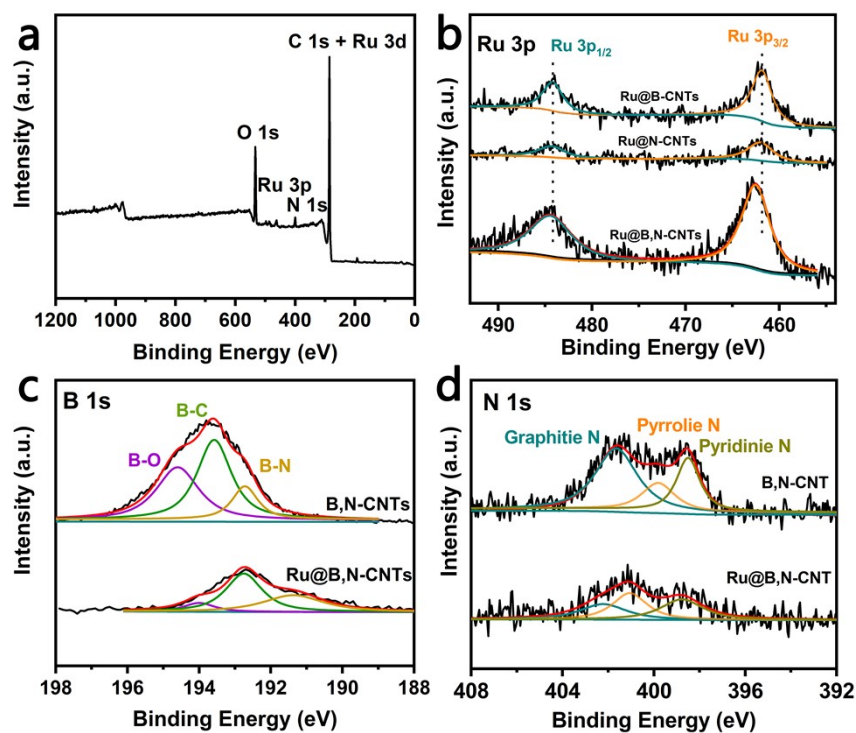

**Figure S2** (a) Survey of the as-prepared Ru@B,N-CNTs. (b) Ru 3p XPS spectra of Ru@B-CNTs, Ru@N-CNTs and Ru@B,N-CNTs. (c, d) B 1s and N 1s XPS spectra of B,N-CNTs and Ru@B,N-CNTs.

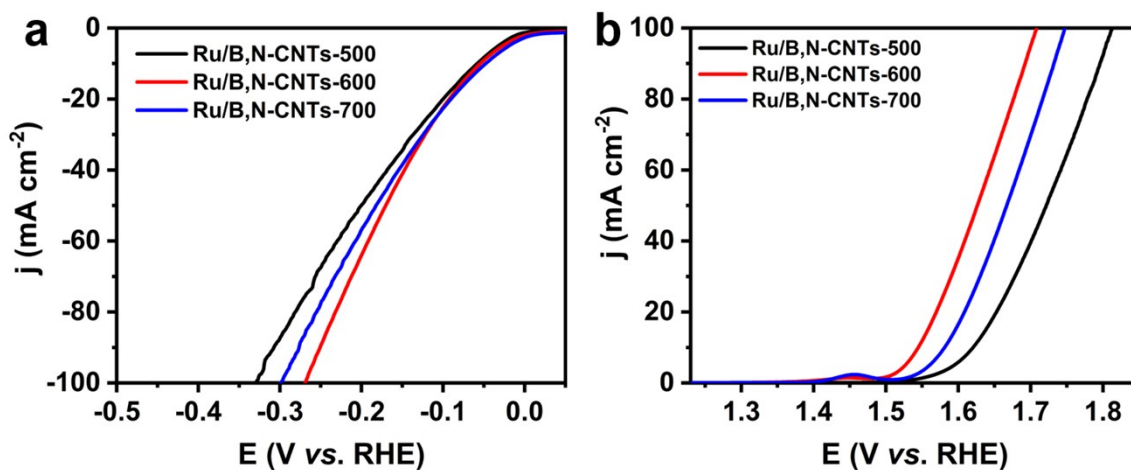

**Figure S3** LSV curves of calcinated at 500 °C, 600 °C and 700 °C toward HER (a) and OER (b).

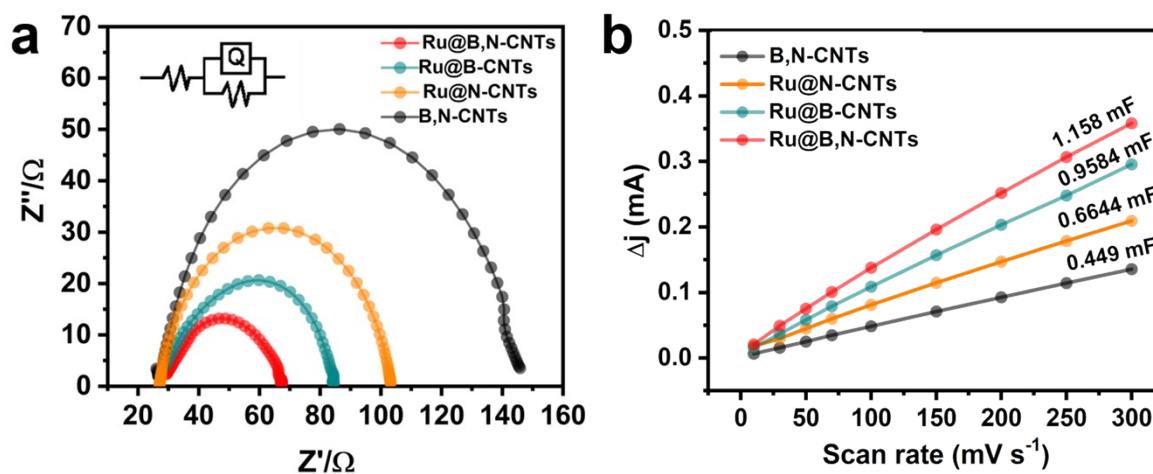

**Figure S4** (a) Electrochemical impedance spectroscopy (EIS) impedance spectrum of B,N-CNTs, Ru@B-CNTs, Ru@N-CNTs and Ru@B,N-CNTs in 1 M KOH solution. (b)  $C_{dl}$  values calculated based on the plots of the difference in current density ( $J$ ) between the anodic and cathodic sweeps (Janodic–Jcathodic) at 0.12 V vs. RHE against the scan rate.

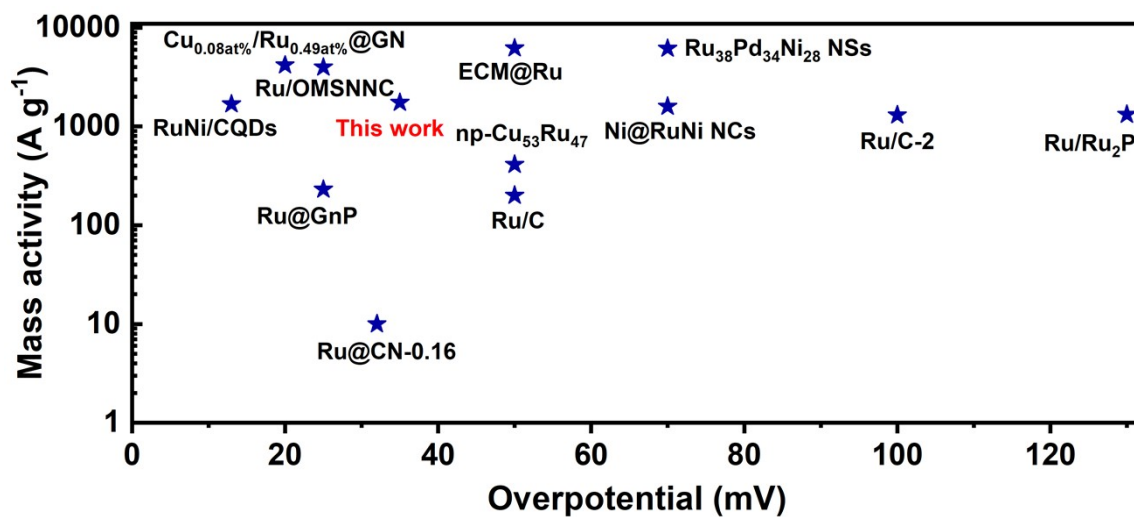

**Figure S5** Comparison of ruthenium mass activities ( $j_{\text{Ru}}$ ) of ruthenium-based catalysts.

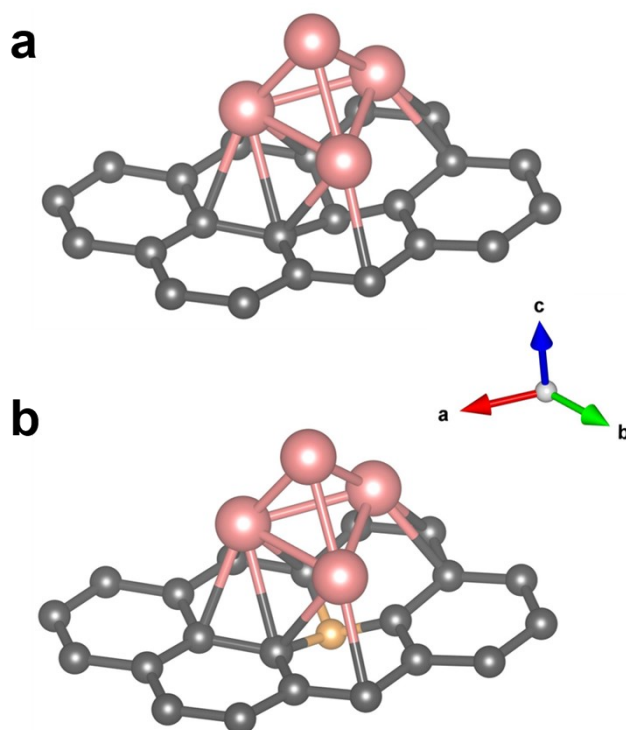

**Figure S6** Optimized structures of H\* adsorbed on Ru cluster anchoring on carbon nanotubes (a) and nitrogen-doped carbon nanotubes (b) model. Ruthenium, nitrogen and carbon atoms are in pink, blue, yellow and grey respectively

**Table S1.** Relative amounts (at.%) of the different elements on the surfaces of the materials investigated in the work. Analysis is done based in their XPS spectra.

| <b>Catalyst</b> \ <b>Amounts (at.%)</b> | <b>C</b> | <b>N</b> | <b>O</b> | <b>B</b> | <b>Ru</b> |
|-----------------------------------------|----------|----------|----------|----------|-----------|
| <b>B,N-CNTs</b>                         | 36.36    | 2.75     | 37.77    | 23.12    | -         |
| <b>Ru@B-CNTs</b>                        | 76.66    | -        | 12.04    | 9.86     | 1.44      |
| <b>Ru@N-CNTs</b>                        | 71.74    | 1.87     | 25.63    | -        | 0.76      |
| <b>Ru@B,N-CNTs</b>                      | 60.01    | 2.68     | 22.48    | 13.42    | 1.41      |

**Table S2.** Summary of specific surface area and pore characteristics of the materials.

| <b>Sample</b>      | <b>BET (m<sup>2</sup>/g)</b> | <b>Pore volume (m<sup>3</sup>/g)</b> | <b>Average pore size (nm)</b> |
|--------------------|------------------------------|--------------------------------------|-------------------------------|
| <b>B,N-CNTs</b>    | 45.8                         | 0.28                                 | 3.16                          |
| <b>Ru@B-CNTs</b>   | 67.2                         | 0.15                                 | 3.32                          |
| <b>Ru@N-CNTs</b>   | 68.5                         | 0.27                                 | 3.41                          |
| <b>Ru@B,N-CNTs</b> | 89.9                         | 0.86                                 | 3.6                           |

**Table S3.** Comparison of the electrocatalytic activities the materials studied for HER and OER among each other and with respect to benchmark noble metal HER and OER catalysts.

| Catalysts              | HER              |                   | OER              |                   |
|------------------------|------------------|-------------------|------------------|-------------------|
|                        | $\eta_{10}$ (mV) | $\eta_{100}$ (mV) | $\eta_{10}$ (mV) | $\eta_{100}$ (mV) |
| <b>B,N-CNTs</b>        | 290              | 623               | 467              | 730               |
| <b>Ru@B-CNTs</b>       | 99               | 354               | 378              | 568               |
| <b>Ru@N-CNTs</b>       | 111              | 430               | 409              | 666               |
| <b>Ru@B,N-CNTs</b>     | 54               | 268               | 315              | 479               |
| <b>Ru@B,N-CNTs-500</b> | 61               | 328               | 390              | 580               |
| <b>Ru@B,N-CNTs-700</b> | 54               | 299               | 350              | 510               |
| <b>Pt/C</b>            | 31               | 313               | -                | -                 |
| <b>RuO<sub>2</sub></b> | -                | -                 | 390              | 579               |

$\eta_{10}$ : The overpotential required by the material to electrocatalyze the reaction at 10 mA cm<sup>-2</sup>.

$\eta_{100}$ : The overpotential required by the material to electrocatalyze the reaction at 100 mA cm<sup>-2</sup>.



**Table S4.** Values of  $C_{dl}$  and  $R_{ct}$  values of the catalysts obtained from their CV curves that are obtained with different scan rates and their equivalent circuit models.

| Catalyst    | $C_{dl}$ (mF cm <sup>-2</sup> ) | ECSA (cm <sup>2</sup> ) | $R_{ct}$ |
|-------------|---------------------------------|-------------------------|----------|
| B,N-CNTs    | 2.27                            | 37.8                    | 57.06    |
| Ru@B-CNTs   | 4.89                            | 81.5                    | 76.39    |
| Ru@N-CNTs   | 3.39                            | 56.5                    | 118.5    |
| Ru@B,N-CNTs | 5.91                            | 98.5                    | 39.04    |

**Table S5.** Electrochemical water splitting performance comparison of Ru@B,N-CNTs with other Ru-based catalyst.

| Catalyst                                | Cell voltage at 10 mA/cm <sup>2</sup> current density | $\eta_{10}$ (mV) for HER | $\eta_{10}$ (mV) for OER | Reference                                         |
|-----------------------------------------|-------------------------------------------------------|--------------------------|--------------------------|---------------------------------------------------|
| Ru@B,N-CNTs                             | 1.57                                                  | 54                       | 315                      | This work                                         |
| Ru-Ru <sub>2</sub> PΦNPC                | 1.50                                                  | 42                       | -                        | Adv. Funct. Mater. 2019, 29, 1901154              |
| Ru-HPC                                  | 1.53                                                  | 22.7                     | -                        | Nano Energy 2019, 58, 1–10                        |
| NiO@RuO <sub>2</sub> @mC                | 1.52                                                  | 129                      | 270                      | Electrochim. Acta 2020, 334, 135653               |
| RuCo@NC-750                             | 1.54                                                  | 25                       | 308                      | Electrochim. Acta 2019, 327, 134958               |
| RuNi-NCNFs                              | 1.564                                                 | 35                       | 290                      | Adv. Sci. 2020, 7, 1901833                        |
| (Ru-Co)O <sub>x</sub>                   | 1.488                                                 | 44.1                     | 171.2                    | Angew. Chem. Int. Ed. 2020, 59, 17219–17224       |
| Ni@Ru/CNS-10%                           | 1.612                                                 | 20.1                     | 356                      | Electrochim. Acta 2019, 320, 134568               |
| Co <sub>3</sub> O <sub>4</sub> -RuCo@NC | 1.66                                                  | 141                      | 247                      | ACS Appl. Mater. Interfaces 2019, 11, 47894–47903 |
| RuO <sub>2</sub> /N-C                   | 1.534                                                 | 40                       | 280                      | ACS Sustainable Chem. Eng. 2018, 6, 11529–11535   |

**Table S6.** Comparison of ruthenium mass activities ( $j_{\text{Ru}}$ ) of ruthenium-based catalysts related to Figure S5.

| Catalyst                                               | Mass activity (A g <sup>-1</sup> ) | Overpotential for calculating mass activity (mV) | Reference                                   |
|--------------------------------------------------------|------------------------------------|--------------------------------------------------|---------------------------------------------|
| <b>Ru@B,N-CNTs</b>                                     | <b>1740</b>                        | <b>35</b>                                        | <b>This work</b>                            |
| Cu <sub>0.08at%</sub> /Ru <sub>0.49at%</sub> @GN       | 4170                               | 20                                               | Appl. Catal. B: Environ. 2020, 270, 118896. |
| Ru/OMSNNC                                              | 3970                               | 25                                               | Adv. Mater. 2021, 33, 2006965.              |
| RuNi/CQDs                                              | 1680                               | 13                                               | Angew. Chem. Int. Ed. 2020, 59, 1718–1726.  |
| Ru@GnP                                                 | 230                                | 25                                               | Adv. Mater. 2018, 30, 1803676.              |
| Ru@CN-0.16                                             | 10                                 | 32                                               | Energy Environ. Sci. 2018, 11, 800-806      |
| ECM@Ru                                                 | 6200                               | 50                                               | Adv. Energy Mater. 2020, 10, 2000882.       |
| np-Cu <sub>53</sub> Ru <sub>47</sub>                   | 410                                | 50                                               | ACS Energy Lett. 2020, 5, 192–199.          |
| Ru/C                                                   | 200                                | 50                                               | Appl. Catal. B: Environ. 2019. 258, 117952. |
| Ru <sub>38</sub> Pd <sub>34</sub> Ni <sub>28</sub> NSs | 6150                               | 70                                               | ACS Cent. Sci. 2019, 5, 1991–1997.          |
| Ru/C-2                                                 | 1300                               | 100                                              | Inter. J. Hydro. 2019, 4 4, 11817-11823.    |
| Ni@RuNi NCs                                            | 1590                               | 70                                               | Sci. China Mater. 2019, 62(12): 1868–1876.  |
| Ru/Ru <sub>2</sub> P                                   | 1320                               | 130                                              | J. Mater. Chem. A 2019, 7, 5621–5625.       |

## Reference

1. C. C. L. McCrory, S. Jung, I. M. Ferrer, S. M. Chatman, J. C. Peters and T. F. Jaramillo. Benchmarking Hydrogen Evolving Reaction and Oxygen Evolving Reaction Electrocatalysts for Solar Water Splitting Devices. *J. Am. Chem. Soc.*, 2015, **137**, 4347–4357.
2. C. C. L. McCrory, S. Jung, J. C. Peters and T. F. Jaramillo. Benchmarking Heterogeneous Electrocatalysts for the Oxygen Evolution Reaction. *J. Am. Chem. Soc.*, 2013, **135**, 16977-16987.
